# Supplementary material for: Identification of a Saltol-independent Salinity Tolerance Polymorphism in Rice Mekong Delta Landraces and Characterization of a Promising Line, Doc Phung
Source: Research Square preprint supplement (doi:10.21203/rs.3.rs-1129525/v1), 2021-12-13
Supplement: Supplementary file 1 [file e886958dd8c2300ee61b1791.xlsx]

## Sheet: Suppl. Table 1
Supplementary Table 1. Mekong Delta rice accessions examined in this study
No.	Accession code	accession name	Province	Landrace/improved lines
1	MDI-1	BO LIEP 2	Ca Mau	Landrace
2	MDI-2	BA BONG MAN	Ca Mau	Landrace
3	MDI-3	LUN PHEN	Ca Mau	Landrace
4	MDI-4	LUN DO	Ca Mau	Landrace
5	MDI-5	LUN PHEN HAT NHO	Ca Mau	Landrace
6	MDI-6	LUN MAN	Ca Mau	Landrace
7	MDI-7	LUN VANG	Ca Mau	Landrace
8	MDI-8	LUN PHET	Ca Mau	Landrace
9	MDI-9	LUN HEN	Ca Mau	Landrace
10	MDI-11	LUN CAN DO	Ca Mau	Landrace
11	MDI-12	LUN CAN TRANG	Ca Mau	Landrace
12	MDI-13	TRANG PHIEU	Ca Mau	Landrace
13	MDI-14	MOT BUI LUN	Ca Mau	Landrace
14	MDI-15	MOT BUI LUN CA MAU	Ca Mau	Landrace
15	MDI-16	MOT BUI TRANG	Ca Mau	Landrace
16	MDI-17	NANG QUOT BIEN	Ca Mau	Landrace
17	MDI-18	NEP SUA	Ca Mau	Landrace
18	MDI-19	SOI LUN	Ca Mau	Landrace
19	MDI-21	DOC PHUNG	Ben Tre	Landrace
20	MDI-22	TRA LONG 2	Ca Mau	Landrace
21	MDI-23	BA BUI 2	Ca Mau	Landrace
22	MDI-24	NANG QUOT BIEN 1	Ca Mau	Landrace
23	MDI-25	MOT BUI LUN 2	Ca Mau	Landrace
24	MDI-26	MONG CHIM DEN	Ca Mau	Landrace
25	MDI-27	NAM TAI 1	Ca Mau	Landrace
26	MDI-28	MONG CHIM ROI 3	Ca Mau	Landrace
27	MDI-29	BA BUI LUN	Ca Mau	Landrace
28	MDI-30	MOT BUI 5	Ca Mau	Landrace
29	MDI-31	MOT BUI DO CAO CA MAU	Ca Mau	Landrace
30	MDI-41	THOM MUA 1	Ca Mau	Landrace
31	MDI-42	HUYET RONG LONG AN	Long An	Landrace
32	MDI-43	TAI NGUYEN SUA	Ca Mau	Landrace
33	MDI-44	MTL110	Ben Tre	Improved rice
34	MDI-49	MTL944	Can Tho	Improved rice
35	MDI-50	MTL560	Can Tho	Improved rice
36	MDI-52	MTL480	Can Tho	Improved rice
37	MDI-53	MTL547	Can Tho	Improved rice
38	MDI-54	MTL939	Can Tho	Improved rice
39	MDI-55	MTL934	Can Tho	Improved rice
40	MDI-56	MTL943	Can Tho	Improved rice
41	MDI-57	MTL926	Can Tho	Improved rice
42	MDI-58	MTL941	Can Tho	Improved rice
43	MDI-59	MTL942	Can Tho	Improved rice
44	MDI-60	MTL946	Can Tho	Improved rice
45	MDI-61	MTL938	Can Tho	Improved rice
46	MDI-62	MTL945	Can Tho	Improved rice
47	MDI-63	MTL936	Can Tho	Improved rice
48	MDI-64	MTL930	Can Tho	Improved rice
49	MDI-65	MTL940	Can Tho	Improved rice
50	MDI-66	MTL372	Can Tho	Improved rice
51	MDI-67	Ba bui 1	Ben Tre	Landrace
52	MDI-68	BA MUOI MUA	Vinh Long	Landrace
53	MDI-69	BA TUC 1	Ca Mau	Landrace
54	MDI-70	BAY TAN	Ca Mau	Landrace
55	MDI-71	BONG VANG	Kien Giang	Landrace
56	MDI-72	CHAU HANG VO	Kien Giang	Landrace
57	MDI-75	CHUM RUOT MUON	Ca Mau	Landrace
58	MDI-77	CHUOI	Tien Giang	Landrace
59	MDI-82	LUA CHUOI	Kien Giang	Landrace
60	MDI-83	NANG DUT 1	Ca Mau	Landrace
61	MDI-85	NANG HUONG 1	Long An	Landrace
62	MDI-86	NANG HUONG TRON	Vinh Long	Landrace
63	MDI-87	NANG KE	An Giang	Landrace
64	MDI-88	NANG KEO BA TU	Tra Vinh	Landrace
65	MDI-89	NANG KEO XIEM 2	Tra Vinh	Landrace
66	MDI-90	NANG NUOOL 3	An Giang	Landrace
67	MDI-91	NANG PHET 3	Ca Mau	Landrace
68	MDI-92	NANG QUOT 1	Ca Mau	Landrace
69	MDI-95	NEP DAI LOAN 2	Ca Mau	Landrace
70	MDI-96	NEP MO 3	Ca Mau	Landrace
71	MDI-97	NEP RUOI SOM 1	Ben Tre	Landrace
72	MDI-98	NEP TAM SAC	Long An	Landrace
73	MDI-99	NEP THAN NONG 1	Ca Mau	Landrace
74	MDI-100	NEP TRANG 1	Ca Mau	Landrace
75	MDI-101	SAI GON	Hau Giang	Landrace
76	MDI-102	SOI DO	Tra Vinh	Landrace
77	MDI-104	TRANG CHI SUOI	Ca Mau	Landrace
78	MDI-105	TRANG CHUM LUA	Tra Vinh	Landrace
79	MDI-106	TRANG LUN 3	Tra Vinh	Landrace
80	MDI-108	TRAU TRON	Hau Giang	Landrace
81	MDI-109	TRUNG KIEN	Kien Giang	Landrace
82	MDI-111	VOI	Ben Tre	Landrace
83	MDI-112	HAI HOANH	Tra Vinh	Landrace
84	MDI-118	THAN NONG DO	Kien Giang	Landrace
85	MDI-119	MAKARI	Kien Giang	Landrace
86	MDI-120	BONG GUNG	Kien Giang	Landrace
87	MDI-121	NANG NONLUC	Kien Giang	Landrace
88	MDI-122	CHIM ROI	Kien Giang	Landrace
89	MDI-123	NEP AO GIA	Kien Giang	Landrace
90	MDI-125	NHO HUONG	Ben Tre	Landrace
91	MDI-126	NANG THOM CHO DAO	Long An	Landrace
92	MDI-127	TAI NGUYEN	Long An	Landrace
93	MDI-128	NEP CHANHHOL	An Giang	Landrace
94	MDI-129	LUA DO	Tra Vinh	Landrace
95	MDI-130	NANG TET	Tra Vinh	Landrace
96	MDI-131	NANG KEO	Ben Tre	Landrace
97	MDI-133	CHO BIEN	Kien Giang	Landrace
The 20 blue-shaded accessions were selected for mineral concentration and whole-genome resequencing analyses.

## Sheet: Suppl. Table 2
Supplementary Table 2. Phenotypic features for the Standard Evaluation System (SES) scores
Score	Status	Phenotypic features
1	High tolerance	Growth and tillering nearly normal
2	High tolerance	Growth nearly normal, but there is some reduction in tillering and one leaf is whitish and rolled
3	Tolerance	Growth nearly normal, but there is some reduction in tillering and two leaves are whitish and rolled
4	Tolerance	Growth and tillering reduced; three to four leaves are whitish and rolled (salt); only a few are elongating
5	Moderate tolerance	Growth and tillering reduced; most leaves whitish and rolled (salt); only a few elongating
6	Moderate tolerance	Growth completely ceases; most leaves dry; the latest leaf is whitish
7	Susceptible	Growth completely ceases; most leaves dry; plant is dying
8	Susceptible	Plant is dead
9	Highly susceptible	Plant is dead and dry
Modified from the standard of IRRI (2013)

## Sheet: Suppl. Table 3
Supplementary Table 3. The preliminary test for salinity responses of tolerant/sensitive groups with 100 and 50 mMol NaCl
Varieties	NaCl concentration (mM)	Salinity reaction	SES score
			5 DAT	10 DAT	15 DAT	20 DAT
#108	100	Tolerant	2.4	4.2	4.3	4.5
Doc Phung			1.3	2	2.7	2.7
Hakphaynhay		Sensitive	3.3	4.8	5.6	6
MTL372			3.3	4.4	5	5.2
#108	50	Tolerant	1.4	2.7	3.2	3.5
Doc Phung			1	1	1.7	1.8
Hakphaynhay		Sensitive	1.3	1.5	3.8	4
MTL372			2	2	3.3	4
DAT: Days after treatment; the SES score of four varieties in control condition (0 mM NaCl) were 1.0.

## Sheet: Suppl. Table 4
Supplementary Table 4. SES and phenotypic values in the 97 MDI accessions and their ranking
#	Accessions	SES at 20 DAT	Shoot length elongation	Root length elengation	Shoot dry weight	Root dry weight	SUM (Phenotypic values)
1	MDI-21	2	0.59	1.08	0.83	0.95	3.45
2	MDI-24	3.33	0.29	1.68	0.56	0.73	3.26
3	MDI-88	3.33	0.4	1.28	0.61	0.77	3.06
4	MDI-14	2.67	0.77	1.09	0.5	0.51	2.87
5	MDI-19	3.33	0.53	0.69	0.75	0.86	2.83
6	MDI-59	3.33	0.35	1.35	0.47	0.65	2.82
7	MDI-17	2.67	0.35	1.07	0.56	0.71	2.69
8	MDI-13	2.33	0.5	1.2	0.45	0.51	2.66
9	MDI-123	3.5	0.29	0.84	0.57	0.88	2.58
10	MDI-8	3.5	0.36	1.14	0.54	0.5	2.54
11	MDI-16	5	0.35	1.03	0.4	0.4	2.18
12	MDI-118	3.33	0.25	0.65	0.54	0.68	2.12
13	MDI-131	4.33	0.36	0.57	0.51	0.64	2.08
14	MDI-62	4.33	0.16	1.03	0.4	0.45	2.04
15	MDI-42	3.67	0.14	1.02	0.39	0.46	2.01
16	MDI-44	4	0.33	0.72	0.5	0.46	2.01
17	MDI-55	4.67	0.23	0.94	0.39	0.44	2
18	MDI-129	3.67	0.17	0.98	0.39	0.46	2
19	MDI-69	5	0.22	0.97	0.41	0.39	1.99
20	MDI-5	3.67	0.17	1.17	0.31	0.33	1.98
21	MDI-52	3.33	0.16	0.98	0.39	0.43	1.96
22	MDI-3	5	0.16	1.17	0.27	0.31	1.91
23	MDI-56	4	0.38	0.57	0.46	0.48	1.89
24	MDI-12	3	0.4	0.69	0.44	0.36	1.89
25	MDI-58	4	0.2	0.72	0.47	0.49	1.88
26	MDI-6	3.67	0.08	0.96	0.37	0.43	1.84
27	MDI-105	4.5	0.12	1.03	0.33	0.36	1.84
28	MDI-31	3.67	0.42	0.58	0.4	0.4	1.8
29	MDI-82	4.67	0.19	0.81	0.39	0.39	1.78
30	MDI-15	3.67	0.24	0.79	0.35	0.36	1.74
31	MDI-66	3.67	0.24	0.59	0.42	0.47	1.72
32	MDI-22	3.33	0.18	0.71	0.36	0.42	1.67
33	MDI-102	6.67	0.12	0.7	0.42	0.43	1.67
34	MDI-26	4	0.18	0.44	0.43	0.56	1.61
35	MDI-53	5.67	0.19	0.85	0.27	0.28	1.59
36	MDI-104	4	0.23	0.48	0.48	0.4	1.59
37	MDI-63	4.33	0.2	0.64	0.32	0.41	1.57
38	MDI-83	4.5	0.13	0.8	0.31	0.32	1.56
39	MDI-11	4	0.21	0.8	0.28	0.25	1.54
40	MDI-86	5	0.1	0.76	0.3	0.37	1.53
41	MDI-65	3.33	0.24	0.47	0.39	0.39	1.49
42	MDI-130	5	0.08	0.78	0.26	0.28	1.4
43	MDI-54	4.67	0.31	0.46	0.31	0.3	1.38
44	MDI-77	5	0.16	0.62	0.29	0.31	1.38
45	MDI-85	4	0.16	0.53	0.32	0.3	1.31
46	MDI-99	7.33	0.07	0.4	0.43	0.4	1.3
47	MDI-90	3.33	0.07	0.22	0.51	0.5	1.3
48	MDI-127	6.33	0.11	0.48	0.32	0.38	1.29
49	MDI-57	4.33	0.21	0.18	0.45	0.39	1.23
50	MDI-100	6.67	0.08	0.39	0.34	0.37	1.18
51	MDI-109	8.5	0.05	0.48	0.31	0.3	1.14
52	MDI-29	7.5	0.12	0.36	0.29	0.37	1.14
53	MDI-4	5	0.15	0.37	0.29	0.29	1.1
54	MDI-97	5	0.28	0.19	0.33	0.3	1.1
55	MDI-61	3.67	0.18	0.16	0.43	0.32	1.09
56	MDI-60	3.5	0.18	0.06	0.49	0.36	1.09
57	MDI-126	5	0.11	0.21	0.35	0.41	1.08
58	MDI-68	7.67	0.13	0.31	0.32	0.3	1.06
59	MDI-25	7.5	0.12	0.36	0.26	0.31	1.05
60	MDI-133	8.33	0.06	0.49	0.21	0.28	1.04
61	MDI-125	5.67	0.19	0.05	0.41	0.38	1.03
62	MDI-95	7	0.04	0.38	0.32	0.28	1.02
63	MDI-50	5.33	0.13	0.31	0.27	0.25	0.96
64	MDI-67	9	0.19	0.2	0.26	0.28	0.93
65	MDI-71	8.33	0.05	0.21	0.31	0.36	0.93
66	MDI-64	4.33	0.11	0.16	0.3	0.29	0.86
67	MDI-41	7.33	0.06	0.42	0.18	0.17	0.83
68	MDI-7	9	0.03	0.34	0.23	0.21	0.81
69	MDI-92	7	0.02	0.37	0.19	0.22	0.8
70	MDI-28	8.33	0.11	0.09	0.32	0.28	0.8
71	MDI-75	4.67	0.13	0.03	0.35	0.27	0.78
72	MDI-9	7.5	0.19	0.17	0.21	0.21	0.78
73	MDI-101	7.67	0.17	0.05	0.25	0.3	0.77
74	MDI-49	8	0.16	0.15	0.21	0.18	0.7
75	MDI-72	8.33	0.05	0.14	0.24	0.27	0.7
76	MDI-18	8	0.04	0.22	0.24	0.19	0.69
77	MDI-119	9	0.13	0.16	0.17	0.21	0.67
78	MDI-122	8.67	0.1	0.17	0.18	0.21	0.66
79	MDI-2	8.33	0.1	0.2	0.16	0.19	0.65
80	MDI-70	8.67	0.13	0.22	0.15	0.15	0.65
81	MDI-1	9	0.12	0.21	0.14	0.16	0.63
82	MDI-43	9	0.09	0.22	0.16	0.15	0.62
83	MDI-27	9	0.08	0.09	0.19	0.24	0.6
84	MDI-128	9	0.07	0.11	0.16	0.21	0.55
85	MDI-23	9	0.18	0.02	0.17	0.17	0.54
86	MDI-120	9	0.01	0.21	0.14	0.17	0.53
87	MDI-30	9	0.17	0.06	0.13	0.14	0.5
88	MDI-106	9	0.04	0.05	0.17	0.19	0.45
89	MDI-98	9	0.08	0.01	0.15	0.21	0.45
90	MDI-96	9	0.06	0.13	0.12	0.11	0.42
91	MDI-121	9	0.03	0.02	0.15	0.2	0.4
92	MDI-112	9	0.06	0	0.11	0.18	0.35
93	MDI-91	9	0.05	0.05	0.1	0.12	0.32
94	MDI-111	9	0.02	0	0.11	0.17	0.3
95	MDI-87	8.33	0.04	0.01	0.12	0.12	0.29
96	MDI-108	9	0.03	0.01	0.09	0.13	0.26
97	MDI-89	9	0.03	0.01	0.08	0.13	0.25
		Average	0.18	0.5	0.33	0.35
		Standard deviation	0.134	0.393	0.146	0.173
The 20 blue-shaded accessions were selected for mineral concentration and GWAS analyses.

## Sheet: Suppl. Table 5
Supplementary Table 5. Concentrations (mg/gDW) of mineral ions (Na+, K+, Ca2+, Mg2+) and Na2+/K+ ratio in root, stem, and leaf of 20 accessions in 100 mM NaCl at 20 DAT*
Accessions		Root (mg/gDW)					Stem (mg/gDW)					Leaf (mg/gDW)
	SES 20 DAT	Na+	K+	Ca2+	Mg2+	Na+/K+	Na+	K+	Ca2+	Mg2+	Na+/K+	Na+	K+	Ca2+	Mg2+	Na+/K+
MDI-1	9	42.725	6.605	3.98	2.195	7.05	46.865	15.375	6.22	2.73	3.115	45.25	11.115	5.28	2.515	3.985
MDI-7	9	43.605	6.98	3.505	1.85	6.13	23.09	16.715	3.69	2.155	1.33	50.055	19.49	5.58	2.585	2.575
MDI-18	8	54.415	6.725	4.52	2.445	7.395	43.095	20.66	5.575	3.085	2.115	38.28	13.045	5.83	3.43	3.21
MDI-21	2	17.7333	8.5767	1.4067	0.9767	2.2067	13.8833	19.2933	2.97	2.5033	0.7167	15.5133	27.0533	4.55	5.3833	0.6
MDI-22	3.33	19.7733	9.7433	2.2067	1.01	2.24	8.2733	16.6333	3.1	3	0.5633	26.5133	12.7267	4.6467	3.3233	2
MDI-31	3.67	27.94	7.9833	2.2233	0.9567	3.75	20.72	17.4433	2.8267	2.58	1.11	33.37	23.5567	4.53	3.8067	1.45
MDI-41	7.33	48.5567	10.5233	3.6833	1.96	4.63	46.9833	17.8933	6.71	2.7967	2.83	51.1633	16.0733	5.19	2.71	3.1667
MDI-42	3.67	23.68	7.2067	2.61	1.41	3.2867	19.0167	10.2	3.11	2.6433	2.02	31.8533	9.4833	5.2	3.5667	3.2233
MDI-44	5.66667	33.17	8.18	3.28233	1.14467	4.06667	31.771	16.0967	3.87667	2.443	1.98667	37.9877	20.79	5.76133	4.299	1.85
MDI-61	3.66667	45.4467	7.54667	3.316	1.518	5.74333	25.9713	13.6767	4.19433	2.09233	1.84	27.221	10.7067	4.23733	2.87667	2.48333
MDI-64	4.33333	37.1133	7.29667	3.08667	1.76067	4.92333	19.0973	11.8933	4.404	2.32533	1.75667	49.319	9.23333	4.66667	2.987	5.33667
MDI-66	3.66667	32.1867	8.11667	1.86933	1.094	4.23667	24.6693	14.0433	3.946	2.326	2.05667	33.572	15.9633	5.76833	4.26133	2.62
MDI-72	8.33	51.81	8.35	4.0233	2.1667	5.7133	32.39	16.13	5.6	2.72	2	70.0633	19.3067	4.5867	2.6933	3.67
MDI-88	3.33	26.3633	9.2967	1.6933	1.33	2.91	22.39	16.1067	2.6267	2.91	1.5133	32.3433	29.7267	7.6167	6.0667	1.1033
MDI-96	9	42.9433	3.4767	5.33	1.1667	15.4967	82.8333	25.9767	8.49	3.4167	3.18	66.8333	18.5367	7.2067	2.6033	3.6
MDI-102	6.67	28.3233	3.9033	2.4867	1.6133	7.24	4.7833	14.83	2.52	2.4067	0.33	35.3033	15.3167	5.3267	3.42	2.3433
MDI-123	3.5	53.49	13.76	1.84	2.125	4.06	22.965	17.29	1.955	3	1.305	20.35	23.97	4.565	5.055	0.89
MDI-125	5.67	34.49	6.775	3.04	1.245	5.05	29.385	11.86	3.27	2.245	2.38	34.55	19.2	4.675	3.235	1.885
MDI-126	5	32.9	6.3	2.98	1.66	4.865	32.815	12.92	3.775	2.565	2.495	25.74	9.395	4.18	2.795	2.74
MDI-133	8.33	85.3767	9.2867	3.4533	2.6133	9.59	69.3767	17.1367	5.0433	2.8333	3.99	63.6033	20.57	8.41	4.1633	3.1167
* each value of an accession was an average of three independent samples.
Concentrations (mg/gDW) of mineral ions (Na+, K+, Ca2+, Mg2+) and Na2+/K+ ratio in root, stem, and leaf of 20 accessions in 0 mM NaCl at 20 DAT*
Accessions		Root (mg/gDW)					Stem (mg/gDW)					Leaf (mg/gDW)
		Na+	K+	Mg2+	Ca2+	Na+/K+	Na+	K+	Mg2+	Ca2+	Na+/K+	Na+	K+	Mg2+	Ca2+	Na+/K+
MDI-1		1.96033	42.44	4.71567	1.671	0.0533333	0.468333	34.8533	4.562	5.31667	0.01	0	38.59	6.13033	8.06067	0.00666667
MDI-7		1.04133	44.7007	4.90733	1.75667	0.0366667	0.605667	60.0833	4.116	3.99167	0.01	0	47.58	5.59467	7.035	0.00666667
MDI-18		1.08767	50.4475	6.56733	2.767	0.03	0.607667	38.3433	4.07767	3.359	0.0133333	0.333333	53.7067	8.316	6.745	0.00333333
MDI-21		1.018	36.9933	4.05567	1.796	0.0233333	0.513	64.7967	5.73867	5.086	0.01	0	56.01	7.43233	6.34667	0.00333333
MDI-22		0.857333	38.8433	2.676	1.52867	0.0233333	0.451333	38.48	3.36767	3.80067	0.0133333	0	42.2033	5.19067	5.267	0.00333333
MDI-31		1.00933	22.79	1.81133	1.73633	0.0433333	0.403	31.6033	3.93333	3.84233	0.0133333	0	22.41	7.63567	9.169	0.00666667
MDI-41		0.850667	36.96	3.12	1.50167	0.0233333	0.355	29.0233	3.15	4.143	0.0133333	0	28.91	4.84967	7.47867	0
MDI-42		0.641	34.9257	3.16533	1.65267	0.0266667	0.663	41.8733	4.11467	3.99333	0.0133333	0.333333	47.5633	9.03667	9.29	0.01
MDI-44		0.951667	40.1243	3.00167	1.56167	0.0333333	0.283	25.6733	2.65433	2.758	0.01	0	62.5867	7.336	4.84	0.00333333
MDI-61		1.10533	29.5867	2.95533	1.73967	0.0366667	0.412667	28.8633	3.85667	5.45867	0.0133333	0	36.39	7.451	7.605	0.00666667
MDI-64		1.00933	30.0033	2.19	1.769	0.0366667	0.455333	33.7633	3.12667	3.533	0.0133333	0	45.9267	8.46467	6.599	0.00333333
MDI-66		1.03233	28.1533	2.30967	1.61333	0.0333333	0.549667	51.1167	4.13067	4.165	0.01	0	26.3833	8.90967	9.39833	0
MDI-72		1.786	31.7333	2.93833	2.06467	0.0566667	0.38	32.8567	3.227	3.573	0.0133333	0.333333	59.19	6.58833	4.45667	0.00333333
MDI-88		0.742	14.7967	1.60467	1.67733	0.0466667	0.508	59.02	6.67933	4.771	0.01	0	47.9167	5.978	7.223	0.00666667
MDI-96		0.778333	21.1467	2.79267	1.65933	0.04	0.414	32.83	2.78167	3.66533	0.0133333	0.333333	41.2933	6.219	9.09767	0.00666667
MDI-102		1.06233	34.1867	4.72533	2.01933	0.03	0.479	48.9567	4.13633	3.16067	0.0133333	0.333333	32.39	5.56233	6.31	0.00666667
MDI-123		1.24833	23.5333	2.27033	2.37167	0.05	0.495333	41.58	4.421	3.67233	0.0166667	0	42.7267	6.73333	7.05967	0.00333333
MDI-125		0.8525	30.59	2.5315	2.6885	0.03	0.435	21.185	1.908	4.4265	0.02	0	36.89	4.501	6.277	0.005
MDI-126		0.736333	18.0133	2.24733	2.008	0.0466667	0.564	41.4333	3.87833	4.32133	0.0133333	0	41.4433	4.978	6.88233	0.00333333
MDI-133		1.11767	30.3133	3.29367	1.87467	0.04	0.528	64.8367	4.787	3.80367	0.01	0	30.44	6.05933	8.84967	0

## Sheet: Suppl. Table 6A
Supplementary Table 6A. SNPs above the threshold of p-value at 1.00E-04 in Manhattan plot for SES score at 20 DAT (Figure 5A)
No.	Marker	Chr	Position	P-value	q-value
1	S01_18015212	1	18015212	2.97e-06	0.0887466
2	S04_29823701	4	29823701	3.17e-05	0.473614
3	S04_29823688	4	29823688	6.54e-05	0.525308
4	S05_140370	5	140370	8.79e-05	0.525308
5	S05_140371	5	140371	8.79e-05	0.525308
Shaded SNP shows significant at the level of q-value ≤0.1

## Sheet: Suppl. Table 6B
Supplementary Table 6B. SNPs above the threshold of P-value at 1.00E-04 in Manhattan plot for shoot dry weight ratio (Figure 5B)
No.	Marker	Chr	Position	p-value	q-value
1	S01_11466366	1	11466366	2.56e-05	0.0695412
2	S01_11519675	1	11519675	9.78e-05	0.114188
3	S01_12323483	1	12323483	4.77e-05	0.0905219
4	S01_15190150	1	15190150	3.36e-05	0.0717144
5	S01_17479548	1	17479548	1.62e-05	0.0537858
6	S01_18015212	1	18015212	2.51e-08	0.000750013
7	S01_18151907	1	18151907	8.69e-07	0.00649165
8	S01_39153652	1	39153652	6.28e-05	0.0938263
9	S01_42765409	1	42765409	5.07e-05	0.0905219
10	S02_1011301	2	1011301	5.15e-05	0.0905219
11	S02_8593716	2	8593716	1.09e-06	0.00651406
12	S02_10629393	2	10629393	8.21e-05	0.114188
13	S03_14609095	3	14609095	1.36e-06	0.00677303
14	S03_14677220	3	14677220	3.18e-06	0.0118777
15	S05_140365	5	140365	6.07e-05	0.0938263
16	S05_140370	5	140370	3.76e-07	0.00374509
17	S05_140371	5	140371	3.76e-07	0.00374509
18	S07_17260496	7	17260496	3.26e-05	0.0717144
19	S08_20886757	8	20886757	6.28e-05	0.0938263
20	S08_25471407	8	25471407	2.04e-05	0.0609572
21	S10_8878576	10	8878576	3e-05	0.0717144
22	S11_5809582	11	5809582	8.64e-05	0.114188
23	S12_15517392	12	15517392	1.64e-06	0.00700069
Shaded SNPs show significant at the level of q-value ≤0.05
